# Supplementary figures and images for: Synthesis of rhenium–platinum complexes bearing carbaborane ligands and their unusual dynamic behavior †
Source: Royal Society of Chemistry journal article supplement (doi:10.1039/b002043p), 2000-01-01

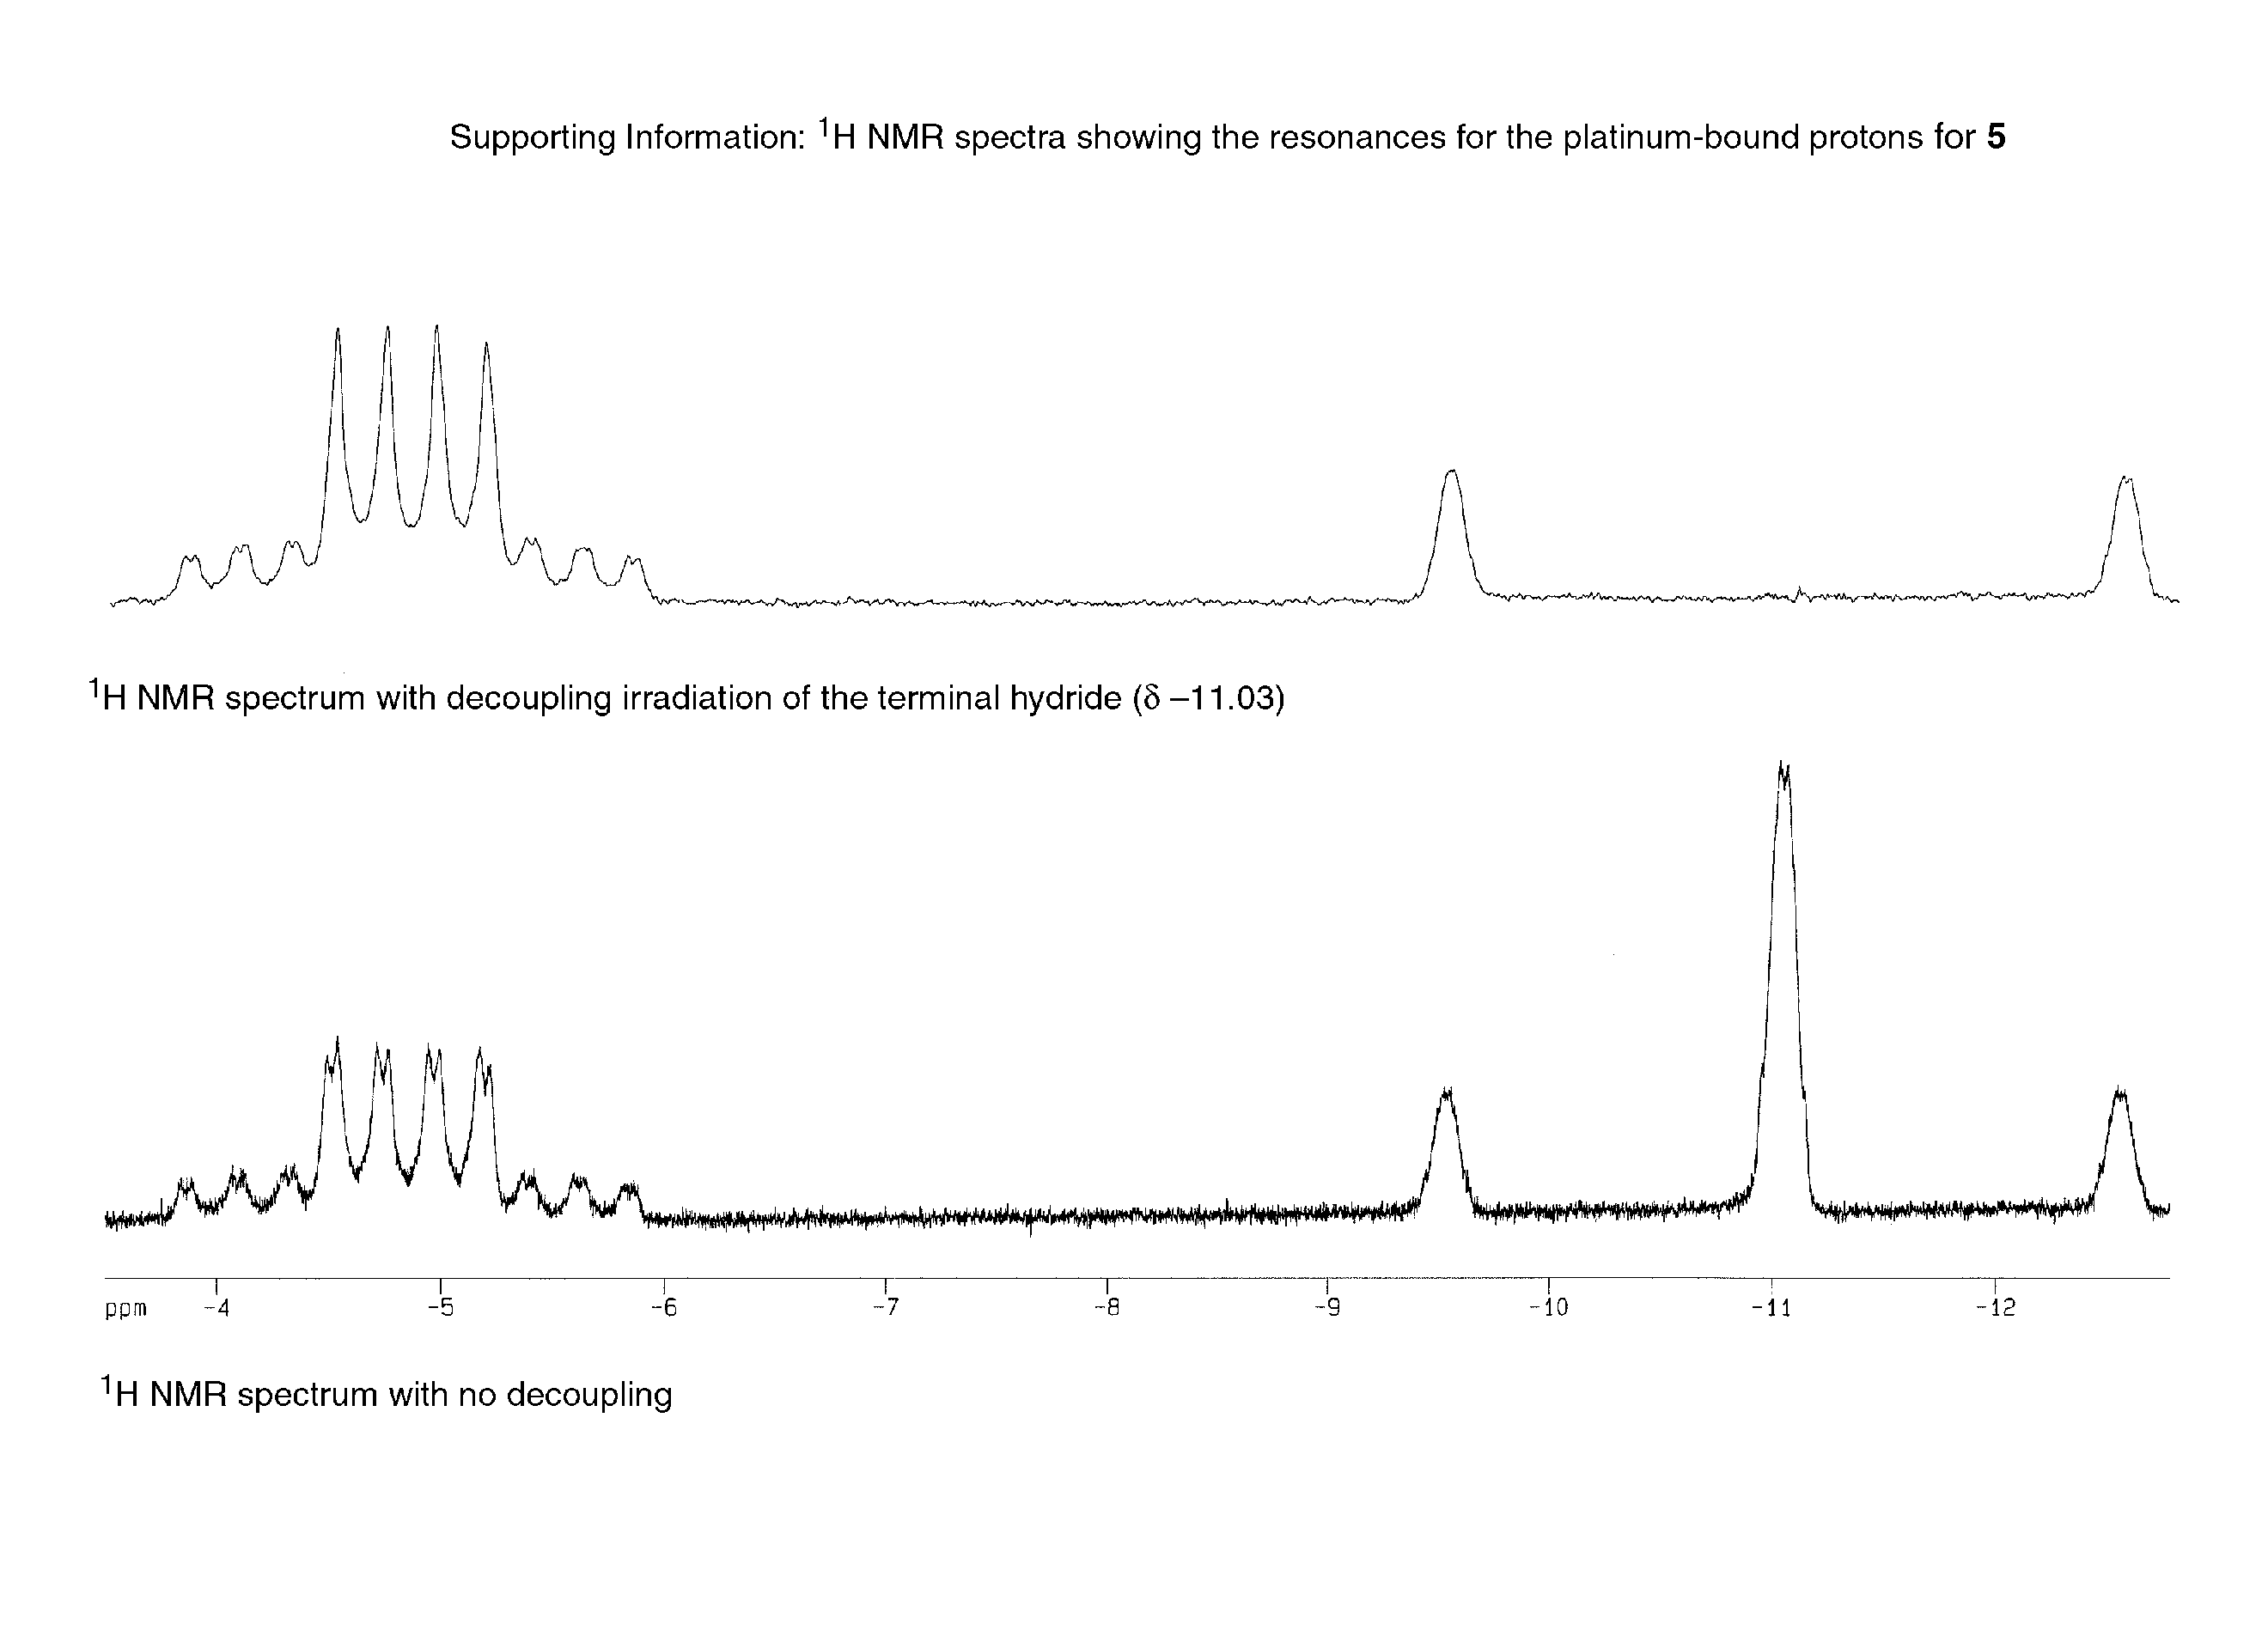

Supplement: b002043p.doc [file b002043p.doc]
